# Supplementary material
Source: Elsevier journal article supplement (https://www.sciencedirect.com/science/article/pii/S253006442200030X)

SUPPLEMENTARY MATERIAL FOR ZANDONÀ (2022)

Table S1. Percentages of Female professors and students in the 29 Post-Graduate Programs in Ecology in Brazil analyzed in this study. Data are from 2016.

| **University** | **Post-Graduate Program** | **CAPES Concept** | **Region** | **%Female professors**  **(Permanent + Collaborators** | **%Permanent Female professors** | **%Female students** |
| --- | --- | --- | --- | --- | --- | --- |
| UERJ | Ecologia e Evolução | 5 | Southeast | 46,4 | 47,6 | 49,3 |
| UFRJ | Ecologia | 6 | Southeast | 21,2 | 19,2 | 54,4 |
| USP | Ecologia | 6 | Southeast | 43,8 | 36,0 | 58,4 |
| UFBA | Ecologia e Biomonitoramento | 6 | Northeast | 27,8 | 28,0 | 51,2 |
| INPA | Ecologia | 6 | North | 38,9 | 37,0 | 43,5 |
| UnB | PGECL | 6 | Central-West | 36,7 | 36,4 | 55,1 |
| UniCamp | Ecologia | 7 | Southeast | 27,8 | 26,1 | 57,5 |
| UFSCAR | Ecologia e Recursos naturais | 4 | Southeast | 35,9 | 63,2 | 64,7 |
| UFRGS | Ecologia | 6 | South | 33,3 | 29,4 | 55,0 |
| UFC | Ecologia e Recursos naturais | 4 | Northeast | 51,7 | 50,0 | 55,2 |
| UENF | Ecologia e Recursos naturais | 5 | Southeast | 44,4 | 53,8 | 72,0 |
| UEM | Ecologia de ambientes aquáticos continentais | 6 | South | 38,7 | 45,8 | 52,8 |
| UFRN | Ecologia | 5 | Northeast | 44,4 | 33,3 | 56,7 |
| UFG | Ecologia e Evolução | 6 | Central-West | 12,5 | 13,6 | 45,5 |
| UFMG | Ecologia, Conservação e Manejo Vida Silvestre | 5 | Southeast | 25,0 | 26,1 | 52,9 |
| UFMT | Ecologia e Conservação da Biodiversidade | 5 | Central-West | 35,0 | 35,3 | 64,1 |
| UFU | Ecologia e conservação de recursos naturais | 6 | Southeast | 38,5 | 38,1 | 50,6 |
| UFSC | Ecologia | 4 | South | 38,9 | 40,0 | 63,2 |
| UFPR | Ecologia e Conservação | 5 | South | 48,1 | 50,0 | 61,8 |
| USP/ESALQ | Ecologia aplicada | 7 | Southeast | 35,4 | 33,3 | 61,7 |
| UFLA | Ecologia Aplicada | 4 | Southeast | 47,6 | 26,7 | 57,4 |
| UVV | Ecologia de Ecossistemas | 4 | Southeast | 31,6 | 33,3 | 60,7 |
| UNEMAT | Ecologia e Conservação | 4 | Central-West | 17,4 | 23,5 | 43,6 |
| UFJF | Ecologia | 4 | Southeast | 31,0 | 29,2 | 54,4 |
| UFMS | Ecologia e Conservação | 5 | Central-West | 28,6 | 40,0 | 54,7 |
| UFV | Ecologia | 4 | Southeast | 23,5 | 26,7 | 56,5 |
| UESC | Ecologia e Conservação da Biodiversidade | 4 | Northeast | 34,8 | 35,3 | 57,1 |
| UNESP-RC | Ecologia e Biodiversidade | 4 | Southeast | 20,0 | 26,7 | 64,3 |
| UFPA | Ecologia | 4 | North | 37,5 | 46,2 | 40,0 |

Figure S1. Percentage of female professors (top graphs) and students (bottom graphs) in the Brazilian Ecology Post-Graduate programs across CAPES scores (left graphs) and Regions (right graphs). Error bars indicate +/- 1 Standard Deviation.


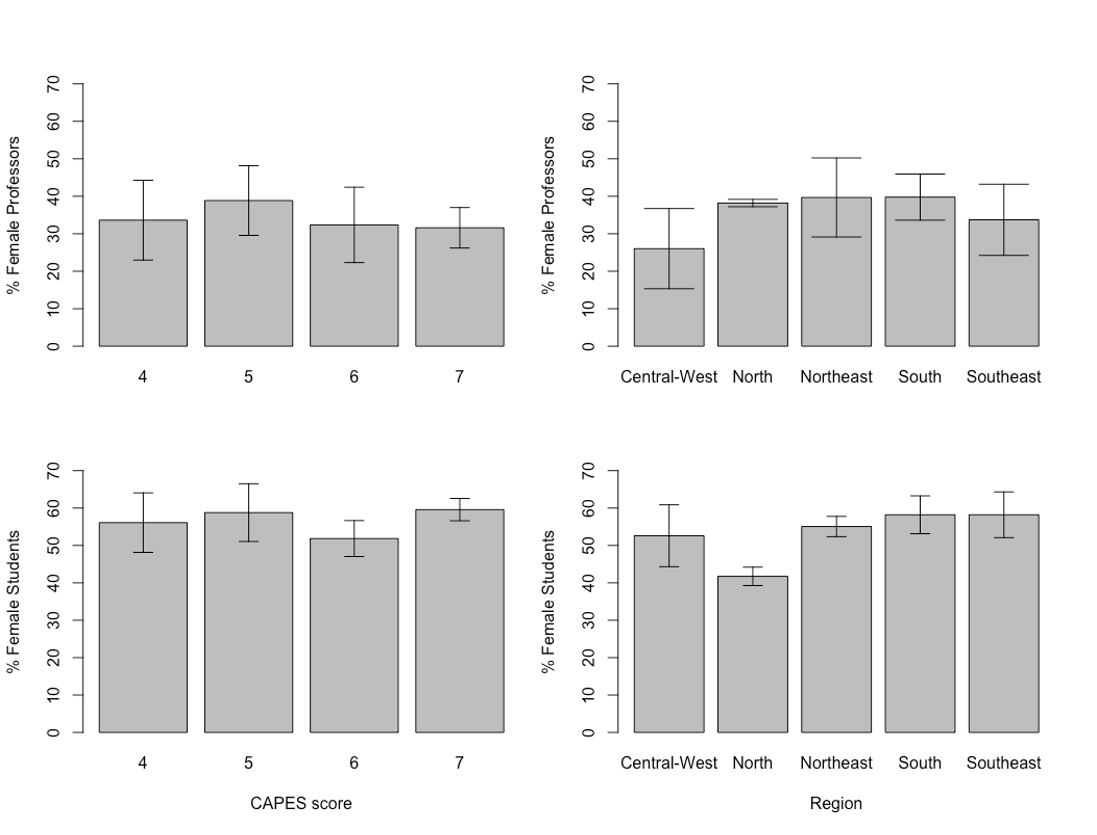

Supplement: mmc1 [file S253006442200030X:mmc1.docx]
